# Supplementary material for: Quantifying triplet formation in conjugated polymer/non-fullerene acceptor blends
Source: Royal Society of Chemistry journal article supplement (doi:10.1039/d2ta05172a), 2022-01-01
Supplement: d2ta05172a1.pdf [file d2ta05172a1.pdf]

## Supporting Information

### Quantifying triplet formation in conjugated polymer / non-fullerene acceptor blends

Junjun Guo,<sup>a</sup> Benjamin Moss<sup>b</sup> and Tracey M. Clarke<sup>a,\*</sup>

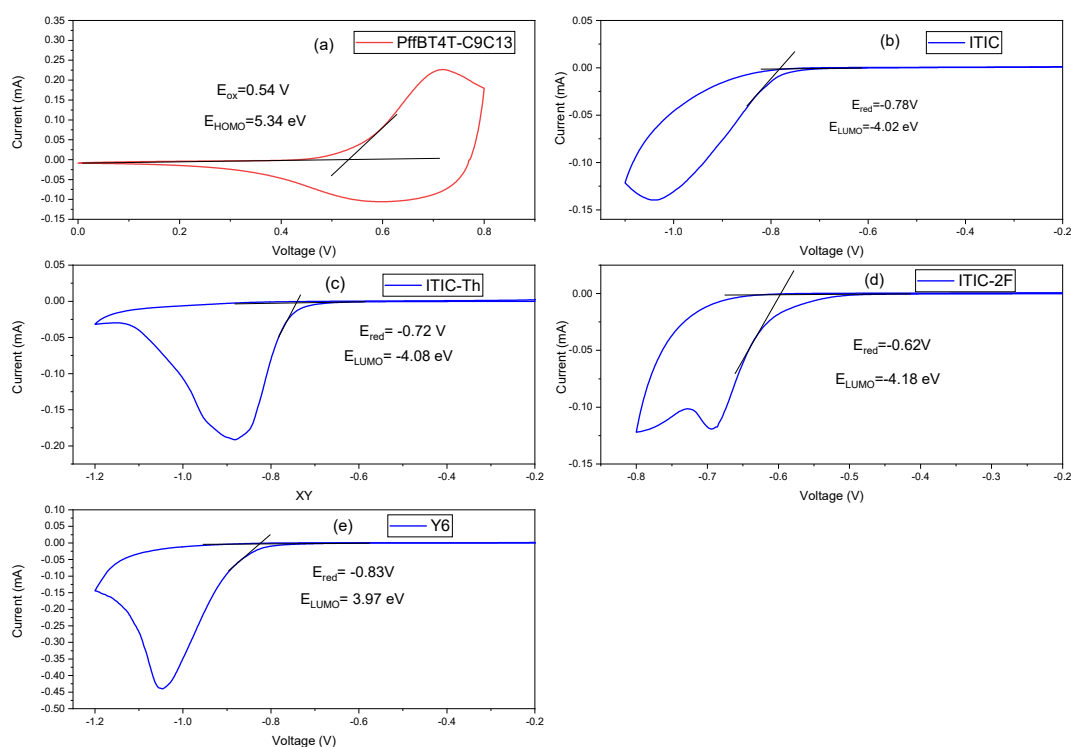

**Figure S1.** Cyclic voltammogram for PffBT4T-C9C13, ITIC-Th, ITIC, ITIC-2F and Y6/Y6 Films in 0.1 M Bu<sub>4</sub>NPF<sub>6</sub> acetonitrile solution with scan rate at 20 mV s<sup>-1</sup> on ITO substrate.

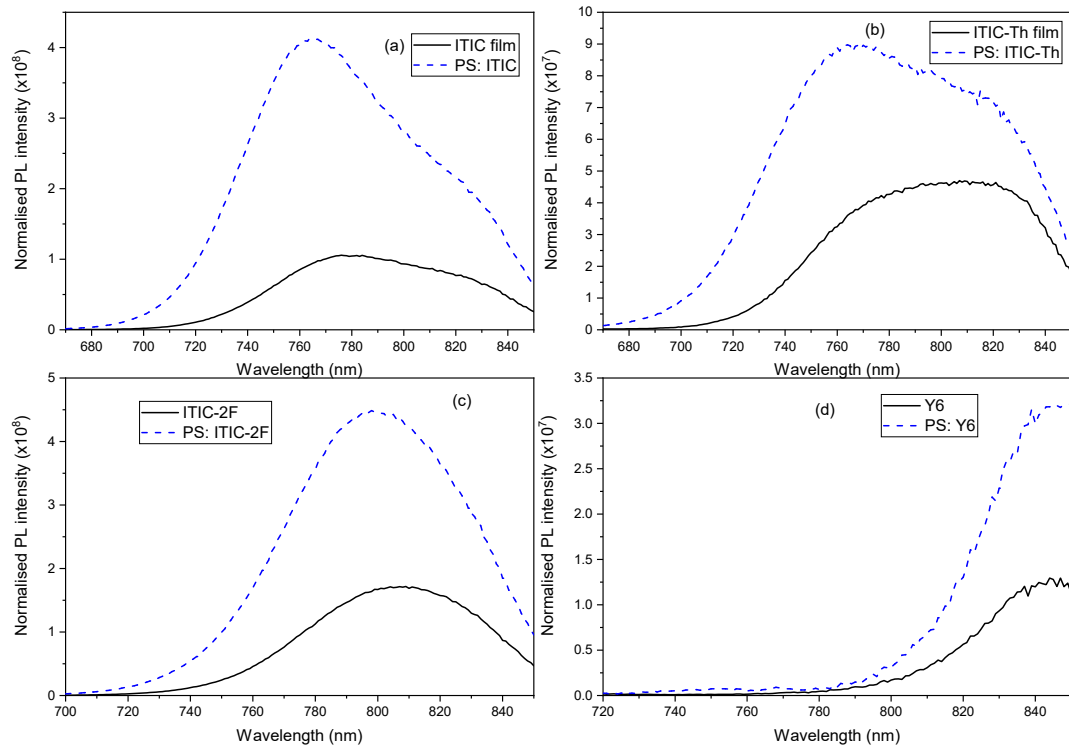

**Figure S2.** Normalised (per absorption) photoluminescence emission for (a) ITIC and PS:ITIC film, (b) ITIC-Th and PS:ITIC-Th film, (c) ITIC-2F and PS:ITIC-2F film (d) Y6 and PS:Y6 film. All films were excited at 650 nm.

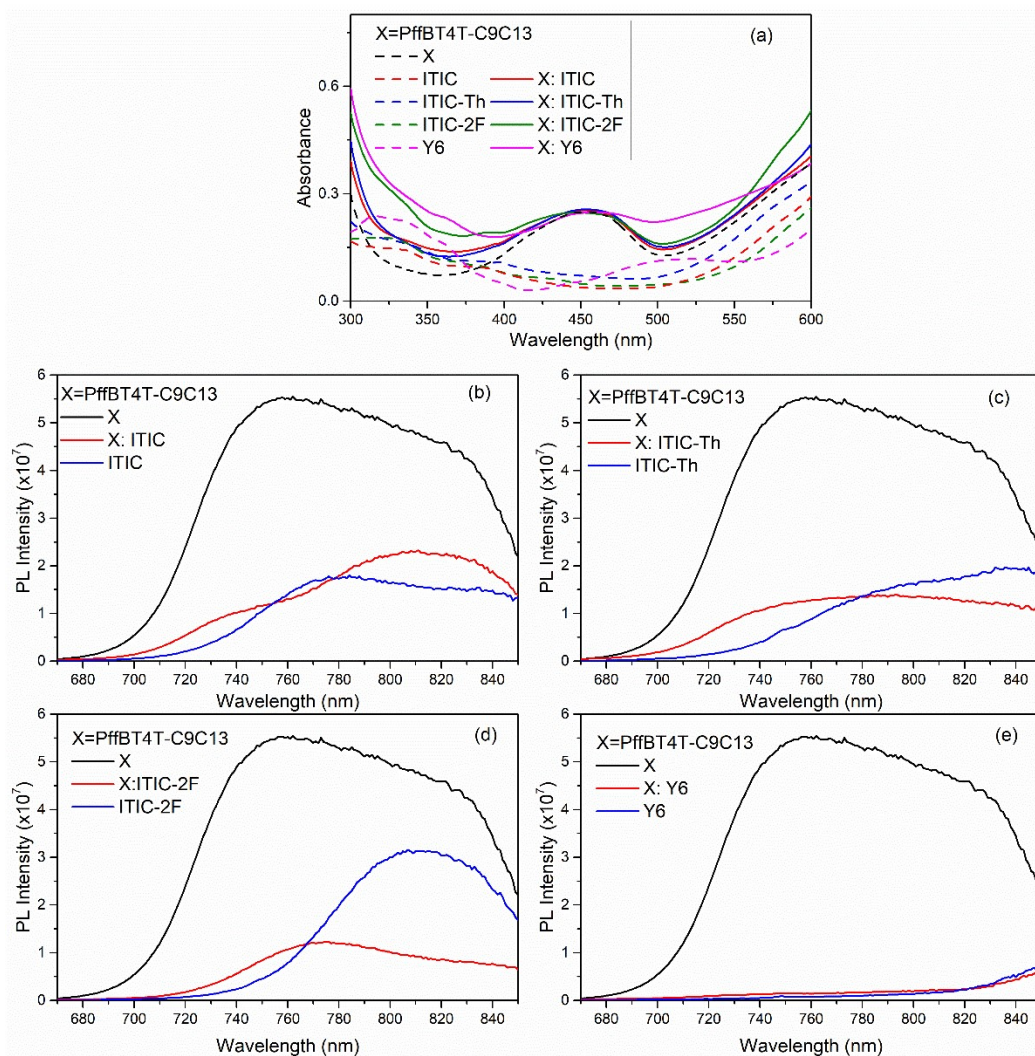

**Figure S3.** (a) Zoom of the 455 nm absorbance peak of PffBT4T-C9C13 used to estimate PL quenching yield, showing the minimal NFA absorbance. Photoluminescence emission spectra of (b) PffBT4T-C9C13: ITIC film, (c) PffBT4T-C9C13: ITIC-Th film, (d) PffBT4T-C9C13:ITIC-2F film, and (e) PffBT4T-C9C13:Y6 film, compared to the pristine components, with 455 nm excitation wavelength.

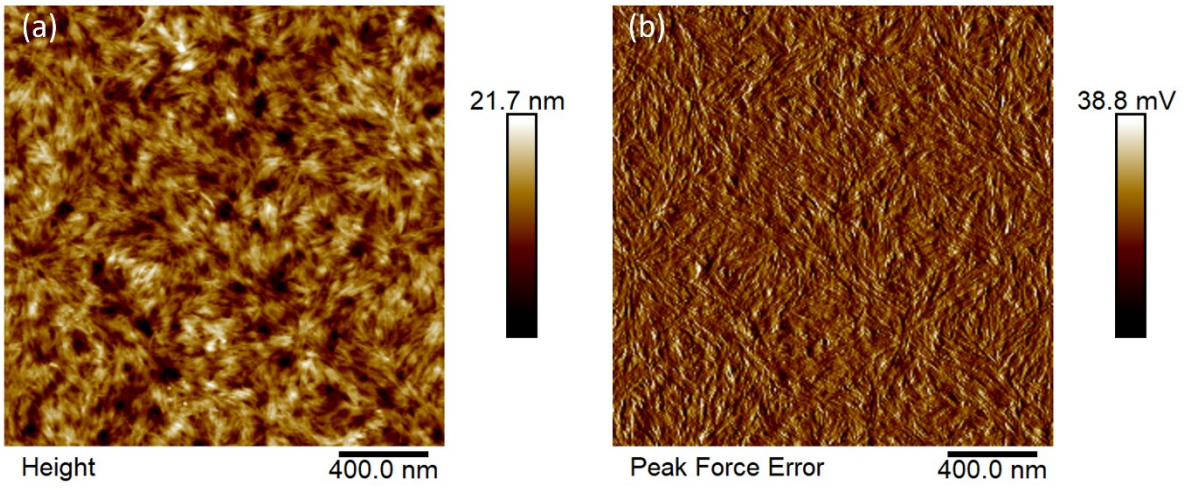

**Figure S4.** AFM (a) height and (b) topography images for PffBT4T-C9C13 film.

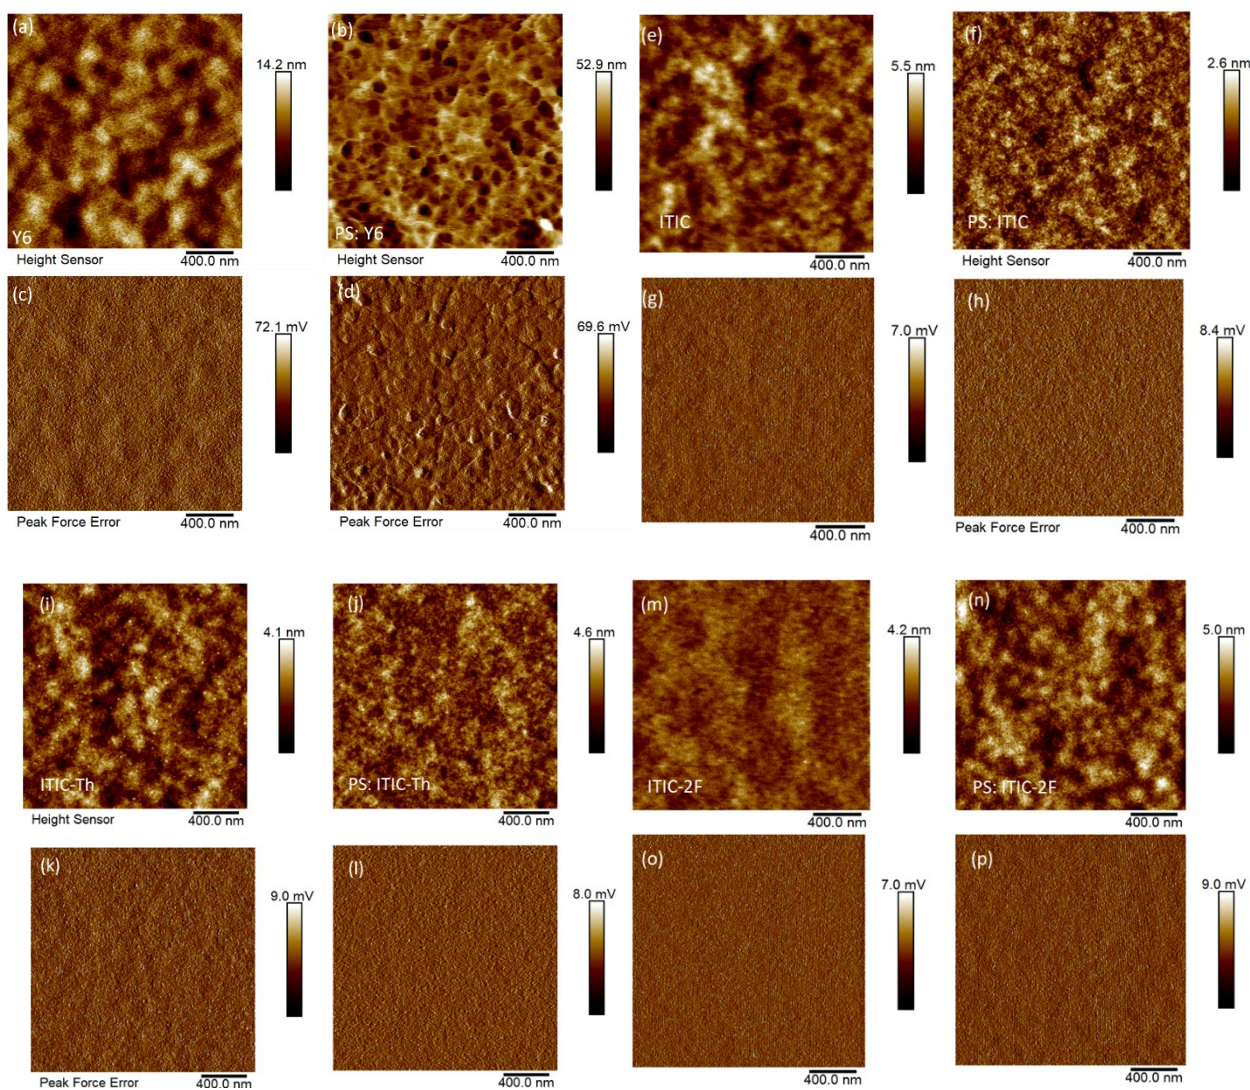

**Figure S5.** AFM images of phase and topography for (a and c) Y6, (b and d) PS:Y6 (1:1.2); (e and g) ITIC, (f and h) PS:ITIC (1:1.2); (i and k) ITIC-Th, (j and l) PS:ITIC-Th (1:1.2); (m and o) ITIC-2F, (n and p) PS:ITIC-2F (1:1.2). Scale bars are 400 nm. Comparing the Y6 and Y6:PS film, an increased roughness from 1.8 nm for Y6 to 5.2 nm for PS:Y6 was found, and an increase in grain size was induced with addition of polystyrene. In contrast, all the ITIC series' films are very smooth, with  $R_q$  values of less than 1 nm.

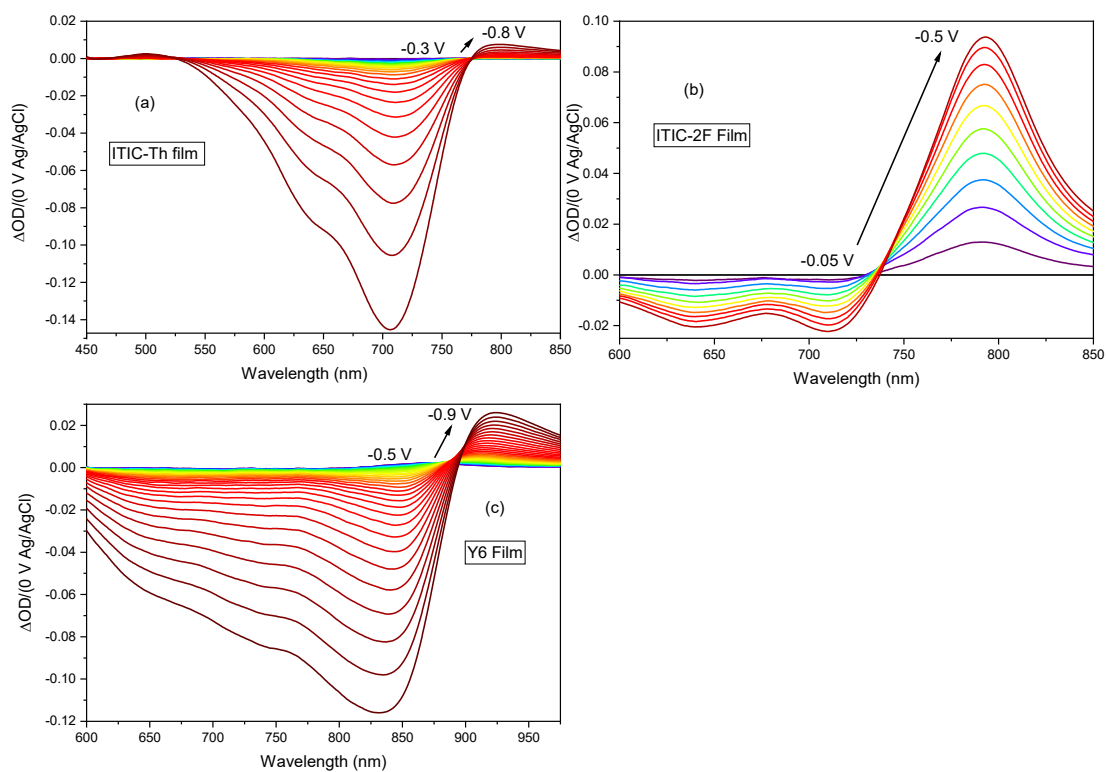

**Figure S6.** Spectroelectrochromic spectra for pristine (a) ITIC-Th, (b) ITIC-2F, and (c) Y6 films. Ag/AgNO<sub>3</sub> was used as a reference electrode and Pt mesh as counter electrode and 0.1 M TBAP in acetonitrile as the electrolyte.

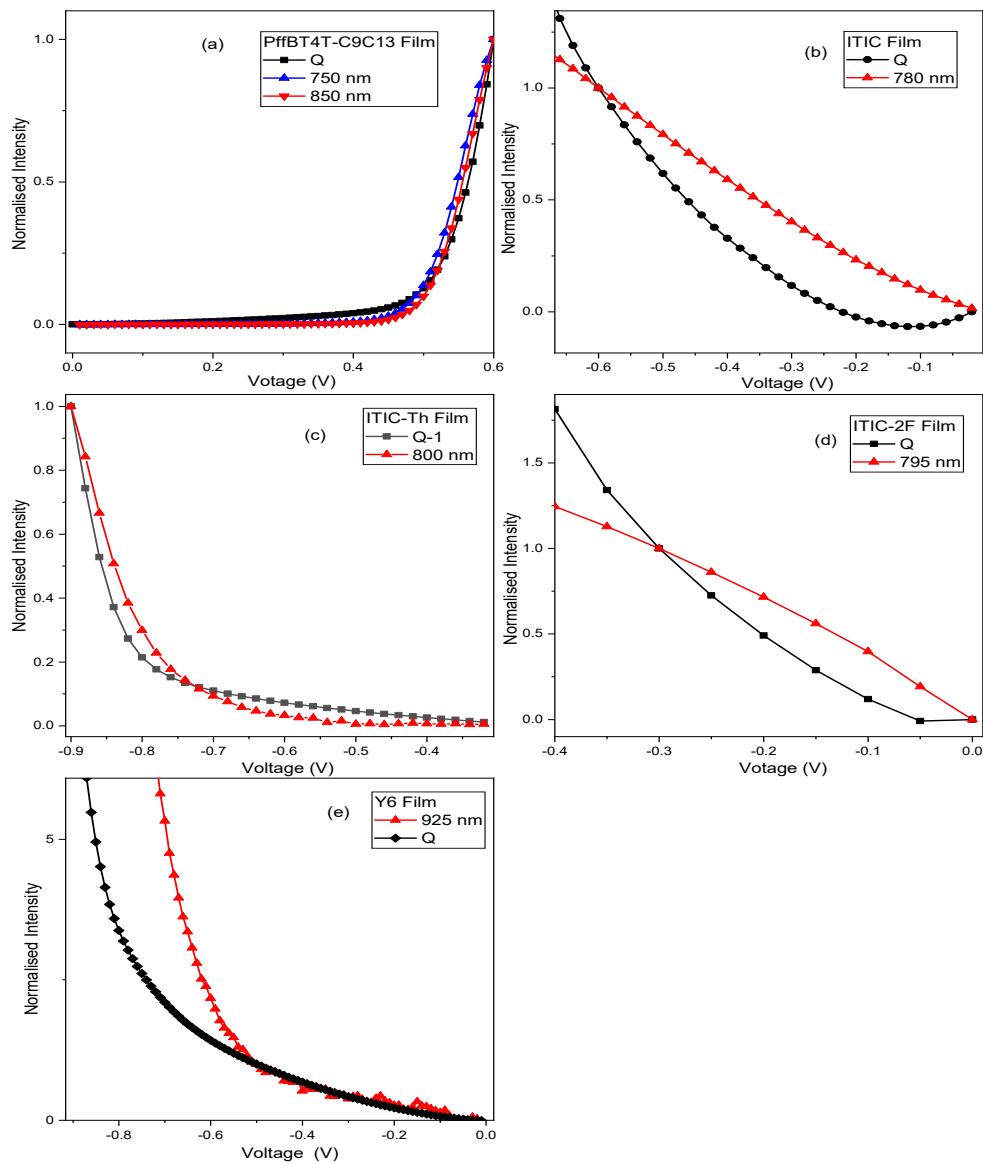

**Figure S7.** Normalised intensity to show the correlation between number of charges generated ( $Q$ , acquired via integration of the JV curve) and the NFA anion peak amplitude variation with applied voltage.

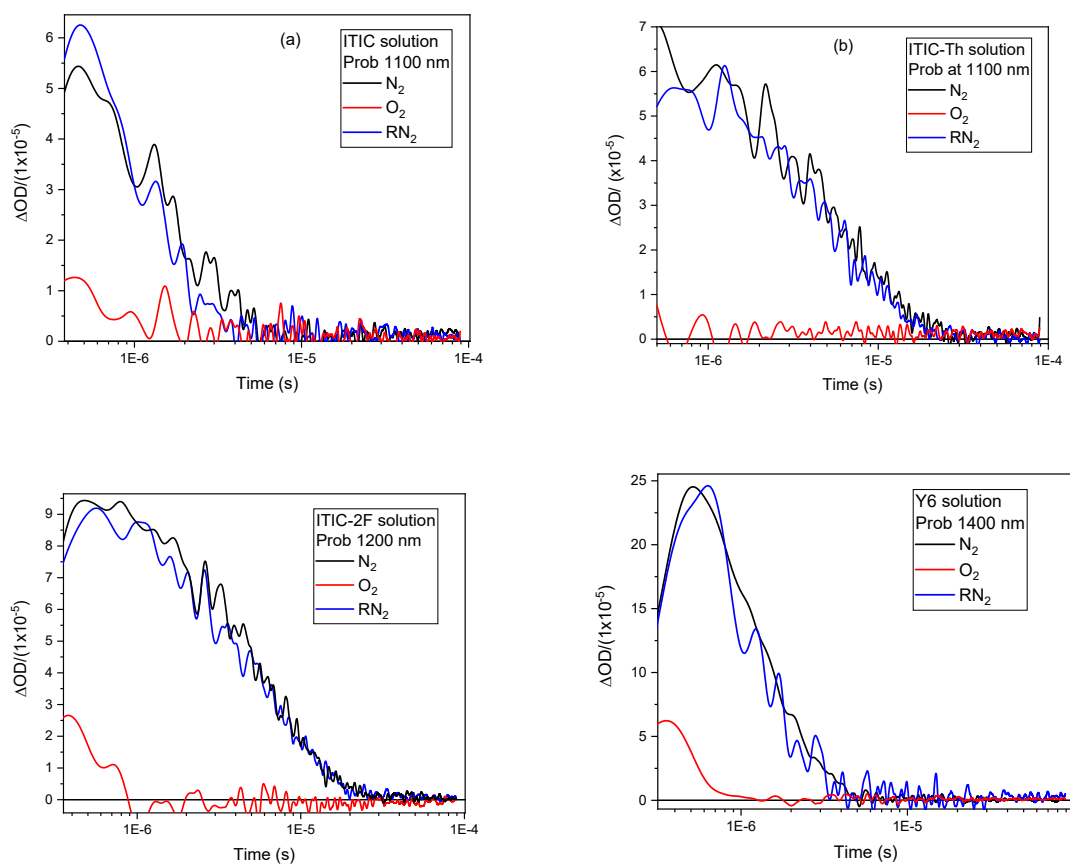

**Figure S8.** Oxygen dependence decay dynamics for the NFA solutions (a) ITIC (b) ITIC-Th (c) ITIC-2F (d) Y6.



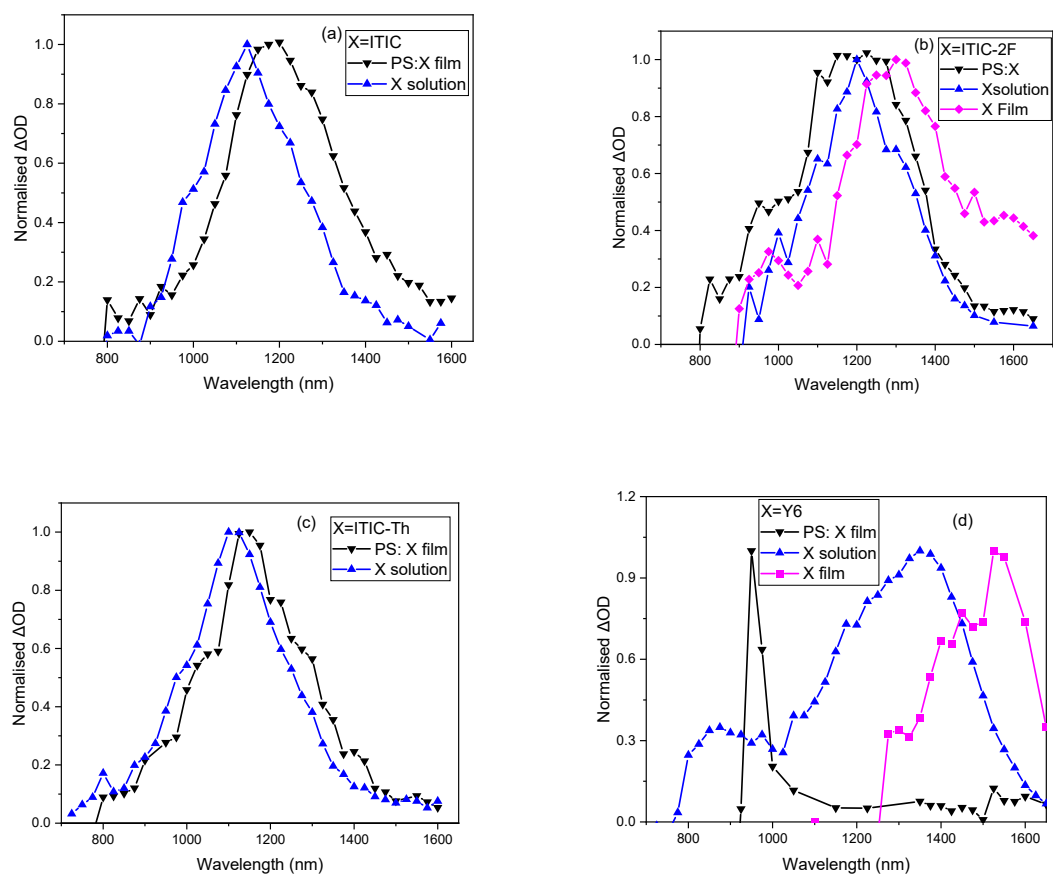

**Figure S9.** Normalised TA spectra comparison for pristine NFAs solution with PS:NFA films (a) ITIC (b) ITIC-Th (c) ITIC-2F (d) Y6.

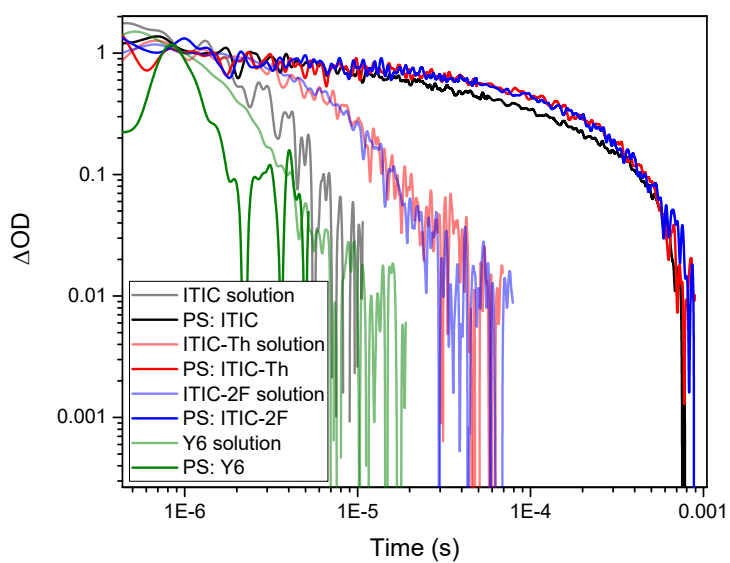

**Figure S10.** Normalised decay dynamics comparison for pristine NFA solutions and PS:NFA films.

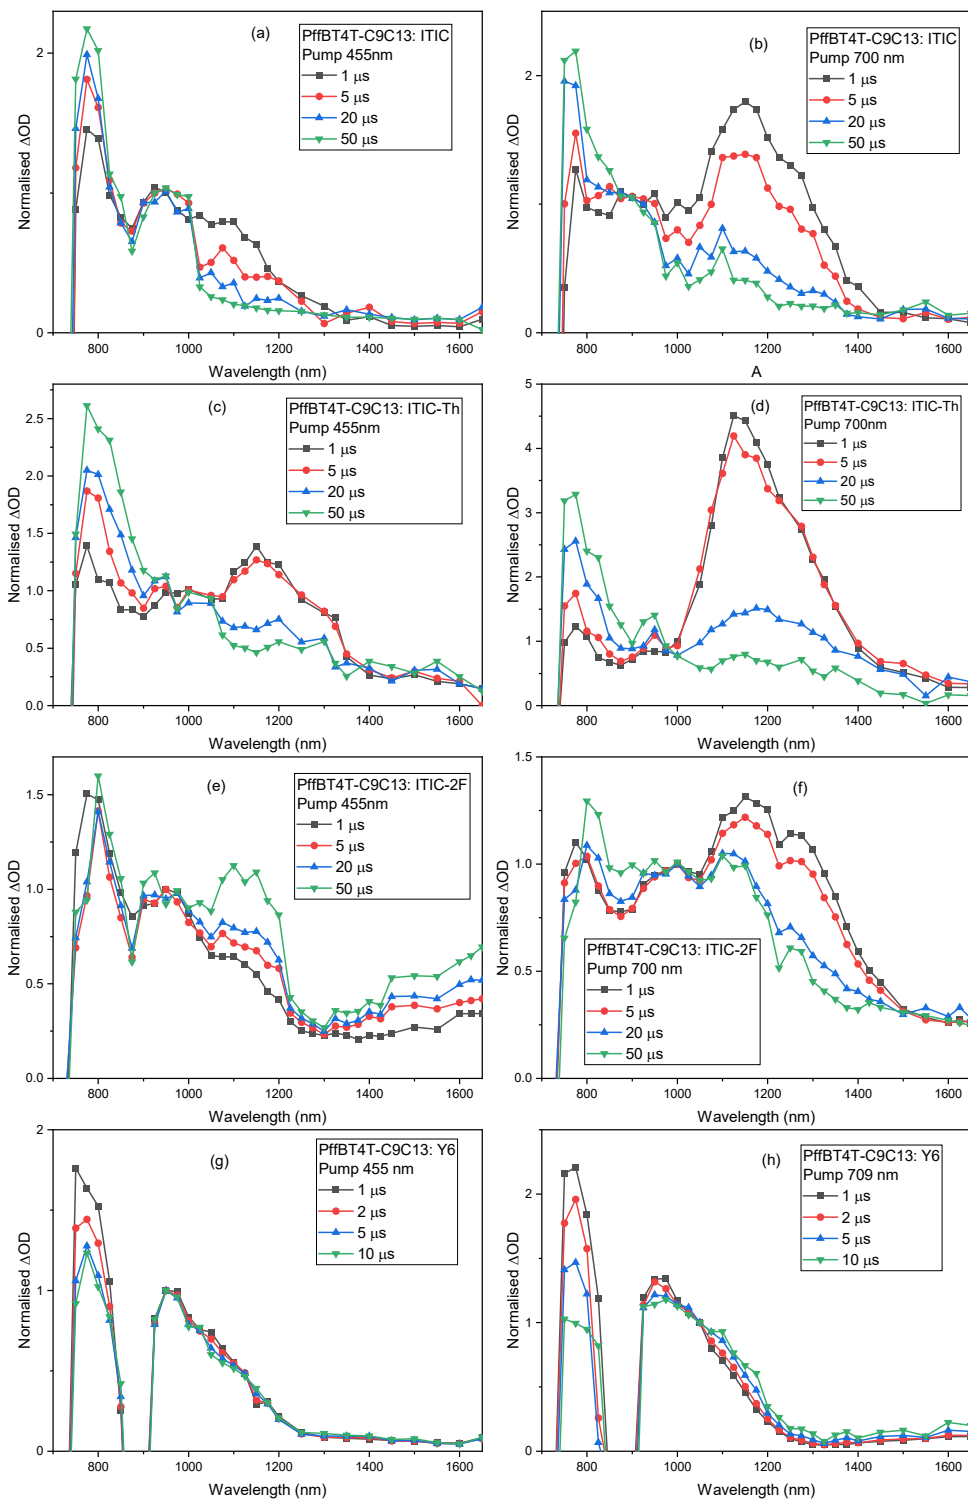

**Figure S11.** Time evolution of the TA spectra of (a) PffBT4T-C9C13: ITIC blend films with excitation wavelength 455 nm and excitation energy  $22 \mu\text{J cm}^{-2}$  at different time scales (b) PffBT4T-C9C13: ITIC blend films with excitation wavelength 700 nm and excitation energy  $18 \mu\text{J cm}^{-2}$  at different time scales

(c) PffBT4T-C9C13: ITIC-2F blend films with excitation wavelength 455 nm and excitation energy  $10 \mu\text{J cm}^{-2}$  at different time scales (d) PffBT4T-C9C13: ITIC-2F blend films with excitation wavelength 700 nm and excitation energy  $8 \mu\text{J cm}^{-2}$  at different time scales (e) PffBT4T-C9C13: ITIC-Th blend films with excitation wavelength 455 nm and excitation energy  $23 \mu\text{J cm}^{-2}$  at different time scales (f) PffBT4T-C9C13: ITIC-Th blend films with excitation wavelength 700 nm and excitation energy  $21 \mu\text{J cm}^{-2}$  at different time scales.(g) PffBT4T-C9C13: Y6 blend films with excitation wavelength 455 nm and excitation energy  $13 \mu\text{J cm}^{-2}$  at different time scales (h) PffBT4T-C9C13: Y6 blend films with excitation wavelength 709 nm and excitation energy  $11 \mu\text{J cm}^{-2}$  at different time scales. The weight ratio for all of the PffBT4T-C9C13/acceptors' blend film is 1:1.2.

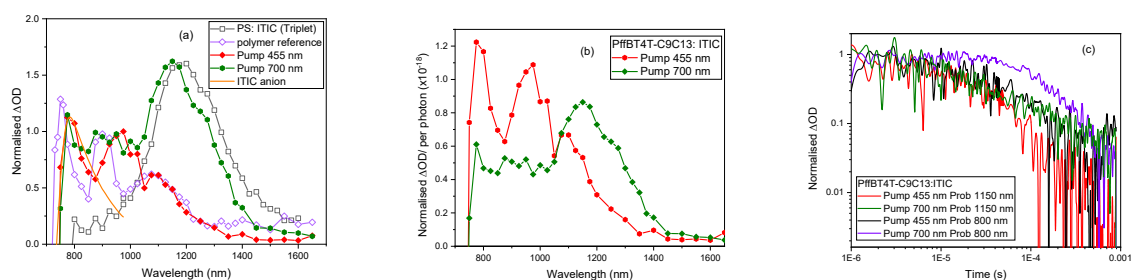

**Figure S12.** (a) Normalised (to 1) TA spectra for PffBT4T-C9C13: ITIC pump at 455 nm (excitation energy  $22 \mu\text{J cm}^{-2}$ ) and 700 nm ( $26 \mu\text{J cm}^{-2}$ ) at  $1 \mu\text{s}$ , PS: ITIC film ( $1 \mu\text{s}$ ) and the annealed PffBT4T-C9C13: PC70BM film with excitation energy  $5 \mu\text{J cm}^{-2}$  at  $50 \mu\text{s}$ . (b) Normalised (per photon) TA spectra for PffBT4T-C9C13: ITIC pump at 455 nm and 700 nm ( $1 \mu\text{s}$ ). (c) Normalised decay dynamics of PffBT4T-C9C13: ITIC film, probing at 800, 1150 nm with excitation wavelength at 455 nm and 700 nm and excitation energy around  $26 \mu\text{J cm}^{-2}$ .

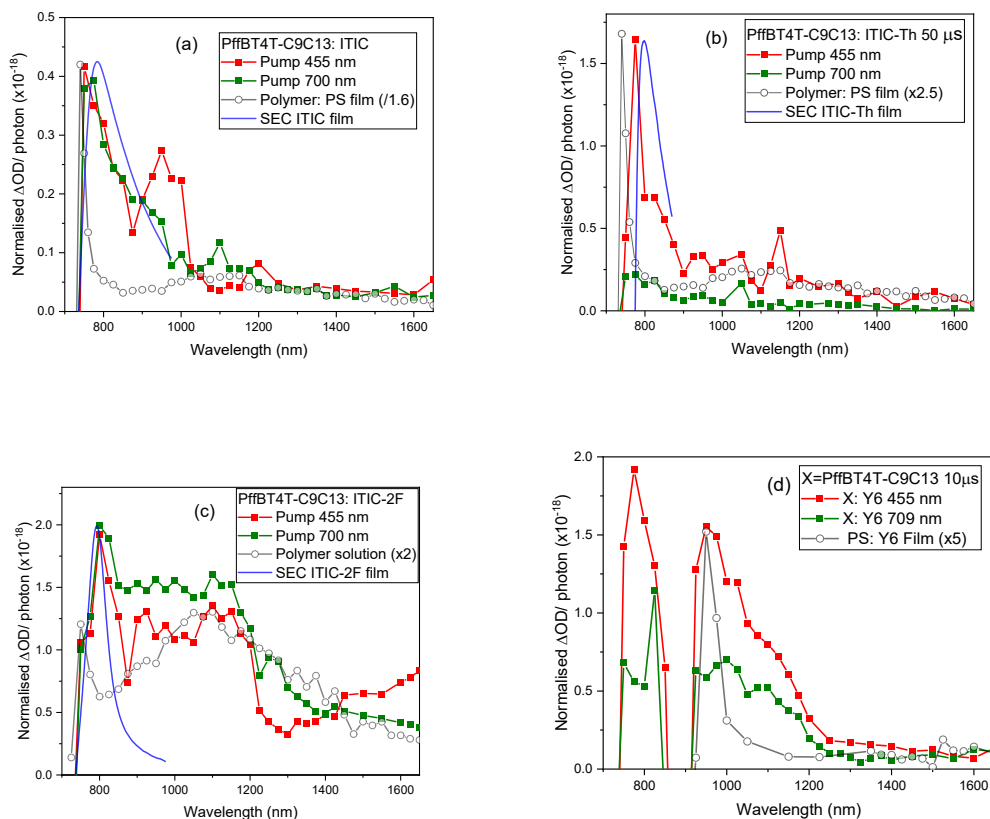

**Figure S13.** Normalised (per photon absorbed) TA spectra for transient absorption spectra of (a) PffBT4T-C9C13: ITIC film at 50  $\mu\text{s}$  (b) PffBT4T-C9C13: ITIC-Th film and pristine PffBT4T-C9C13 film at 50  $\mu\text{s}$ , (c) PffBT4T-C9C13: ITIC-2F film and PffBT4T-C9C13 solution at 50  $\mu\text{s}$ , and (d) PffBT4T-C9C13: Y6 film and PS: Y6 film at 10  $\mu\text{s}$ . The blend PffBT4T-C9C13: ITIC series (ITIC, ITIC-Th, ITIC-2F) are excited at both 455 nm and 700 nm. The excitation energy used for both ITIC and ITIC-Th with excitation energy 23  $\mu\text{J cm}^{-2}$ , and ITIC-2F blend were around 10  $\mu\text{J cm}^{-2}$ , PffBT4T-C9C13: Y6 film was excited at 455 nm and 709 nm with excitation energy around 13  $\mu\text{J cm}^{-2}$ . Films PS with Y6 is excited at 709 nm with excitation energy around 30  $\mu\text{J cm}^{-2}$ . The pristine PffBT4T-C9C13 film and solution are excited at 700 nm with excitation energy 72  $\mu\text{J cm}^{-2}$  and 34  $\mu\text{J cm}^{-2}$ , respectively. The bracket number is the enlarge (x) or divided (/) factor. The Blue line in the above spectra are the SEC spectra for Pristine (a) ITIC (b) ITIC-Th (c) ITIC-2F (d) Y6 films.

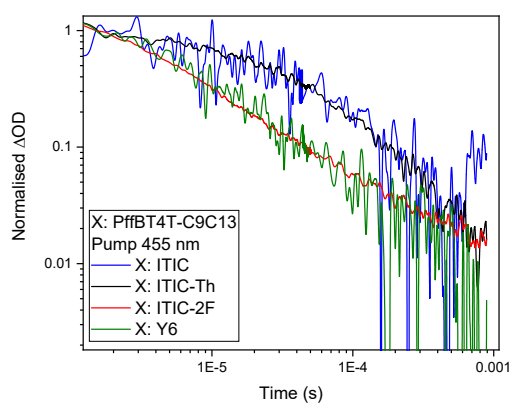

**Figure S14.** Normalised (to 1) decay dynamics for the polymer polaron in PffBT4T-C9C13 blended with NFAs ITIC (probe at 800 nm), ITIC-Th (probe at 775 nm), ITIC-2F (probe at 800 nm) and Y6 (probe at 800 nm) films. The excitation wavelength 455 nm is used for all the films.

## Quantifying triplet populations

When quantifying the triplet formation in the blend films, the triplet molar absorption coefficient was calculated using the sensitisation method. This method involves a triplet sensitizer of known triplet molar extinction coefficient being directly excited, thereafter undergoing a triplet energy transfer to create a lower energy triplet on an acceptor of unknown triplet molar extinction coefficient. After excitation of the donor/sensitizer, the following reactions are therefore relevant:

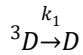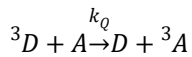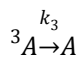

The overall decay of the donor triplet is therefore  $k_2 = k_1 + k_Q[A]$ . Using microsecond transient absorption spectroscopy, the unknown triplet-triplet molar absorption coefficient can be obtained by comparison with that of the donor compound by equation 1. [1]

$$\frac{\varepsilon_T^D}{\varepsilon_T^A} = \frac{\Delta OD^D}{\Delta OD^A} \quad (1)$$

where  $\varepsilon_T^D$  is the triplet extinction coefficient for known donor compound,  $\varepsilon_T^A$  is the triplet extinction coefficient for unknown acceptor material.  $\Delta OD^D$  is the maximum absorbance reached for the triplet-triplet absorption peak of the donor and  $\Delta OD^A$  is the maximum absorbance of the acceptor triplet at their respective wavelength maxima.

However, equation 1 is only relevant under conditions where  $k_Q$  is much greater than  $k_1$  and  $k_3$ . If this is not the case, then additional corrections have to be applied, as detailed in the method of Land et al. Note that Land's additional correction for  ${}^3A$  when it is also formed via direct excitation is negligible in our case.[1]

If decay of the acceptor triplet occurs simultaneously with its creation via energy transfer, a maximum in  $\Delta OD$  will form, as observed in our results. In such cases, considering the kinetics of successive reactions enables the following equation:

$$\Delta OD_{max}^A = \Delta OD^A \left( -\frac{\ln k_2/k_3}{\frac{k_2}{k_3} - 1} \right) \quad (2)$$

Where  $\Delta OD_{max}^A$  is the maximum  $\Delta OD$  observed in the acceptor triplet absorbance in the presence of the donor.

Finally, a correction must also be applied for  ${}^3D$  decay during the energy transfer process, necessary in situations where  $k_1$  is non-negligible. Since this is the case for ZnTPP, a correction factor of  $\frac{k_2}{k_1 + k_2}$  is applied.

For this project, ZnTpp acts as the triplet sensitizer with triplet-triplet molar absorption coefficient  $9500 \text{ M}^{-1} \text{ cm}^{-1}$ . The TA spectra for pristine ZnTPP and the ZnTPP/NFA sensitised solutions are shown in

Figure S15, and the corresponding kinetics in Figure S16. The triplet extinction coefficients for all NFAs are calculated as shown in Table 1 (main text).

To calculate the triplet-triplet molar absorption coefficient, ITIC-2F is used as an example. Figure 15e shows the TA spectra of ZnTpp:ITIC-2F solution. The ZnTPP triplet is located below 900 nm, while the ITIC-2F triplet absorbs maximally at 1150 nm. The ITIC-2F clearly grows in over time, a hallmark of the sensitisation process. The kinetics of the ITIC-2F triplet growth and decay were probed at the maximum of 1150 nm (Figure 16c). Assuming first order behaviour such that  $k_2 = 1/t_2$ , the time constant of the rise ( $3.2 \times 10^{-6}$  s) provides  $k_2$  and the decay provides  $k_3$  ( $1.5 \times 10^{-5}$  s).<sup>[2],[3]</sup> The  $\Delta OD_{max}$  of the ITIC-2F triplet is  $8.1 \times 10^{-4}$ . Applying the corrections detailed above, the corrected  $\Delta OD_{max}$  is  $1.46$

$\times 10^{-3}$ . So the triplet molar extinction coefficient is  $\varepsilon_T^A = \frac{\Delta OD_{max}^A \times \varepsilon_T^D}{\Delta OD^D} = \frac{1.46e-3 \times 9500}{3.4e-4} = 4.1 \times 10^4 \text{ M}^{-1} \text{ cm}^{-1}$ .

The triplet yield in pristine solution can be calculated using the Beer-Lamber Law  $A = \varepsilon cl$ , where  $\varepsilon$  is the triplet extinction coefficient,  $c$  is the concentration of solution, and  $l$  is the path length of the cuvette.

The extinction coefficient of the triplet may differ in a film sample. To address this, we utilise a correction factor methodology by considering the change in absorption cross-section,  $\sigma$ , for the ground state from solution to film. The molar extinction coefficients of the ground state ( $\varepsilon_{GS\_soln}$ ) of each NFA have been measured in chlorobenzene with three different low concentrations ( $10^{-6} - 10^{-5}$  M range), where  $\varepsilon_{GS\_soln}$  is established from the gradient of a plot of absorbance vs concentration. Absorption cross-section is then calculated using the known relationship:

$$\sigma_{GS\_soln} = \frac{\varepsilon_{GS\_soln} \ln 10}{N_A}$$

Where  $\sigma_{GS\_soln}$  is the absorption cross-section in solution and  $N_A$  is Avogadro's number; also noting that an additional factor of 1000 is required for unit equivalence. Film absorption coefficients ( $\alpha$ ) are also converted to absorption cross section ( $\sigma_{GS\_solid}$ ) via  $\sigma_{GS\_solid} = \alpha/N_i$ , where  $N_i$  is the number density of the initial state.  $N_i$  for the ground state can be established from the mass density and molecular weight.

The following equation is then applied to establish the correction factor for each NFA:

$$\sigma_{GS\_solid} = A \sigma_{GS\_soln}$$

Where  $A$  is the correction factor. The values for  $\varepsilon_{GS\_solid}$  have been obtained from literature, except for ITIC-Th, for which none could be found and thus an extrapolation procedure was used. The correction factor is then applied to the  $\varepsilon$  of the NFA triplet, assuming that any change in  $\sigma$  of the ground state from solution to solid will occur similarly for the triplet state. The results are presented in the table below.

| NFA  | $\varepsilon_{GS\_soln}$ ( $10^5 \text{ L mol}^{-1} \text{ cm}^{-1}$ ) | $\sigma_{GS\_soln}$ ( $10^{-16} \text{ cm}^2$ ) | $\alpha$ in film ( $10^5 \text{ cm}^{-1}$ ) <sup>a</sup> | $\sigma_{GS\_solid}$ ( $10^{-16} \text{ cm}^2$ ) | A    | <sup>3</sup> NFA* solution $\varepsilon$ ( $\pm 0.2 \times 10^4 \text{ L mol}^{-1} \text{ cm}^{-1}$ ) | <sup>3</sup> NFA* film $\varepsilon$ ( $\pm 0.4 \times 10^4 \text{ L mol}^{-1} \text{ cm}^{-1}$ ) |
|------|------------------------------------------------------------------------|-------------------------------------------------|----------------------------------------------------------|--------------------------------------------------|------|-------------------------------------------------------------------------------------------------------|---------------------------------------------------------------------------------------------------|
| ITIC | $1.6 \pm 0.5$                                                          | 6.2                                             | 2.4                                                      | $4.7 \pm 0.5$                                    | 0.76 | 2.7                                                                                                   | 2.1                                                                                               |

|         |               |     |     |               |      |     |         |
|---------|---------------|-----|-----|---------------|------|-----|---------|
| ITIC-Th | $1.9 \pm 0.5$ | 7.3 | -   | -             |      | 5.7 | $2.3^b$ |
| ITIC-2F | $2.2 \pm 0.5$ | 8.4 | 2.5 | $5.2 \pm 0.5$ | 0.62 | 4.1 | 2.5     |
| Y6      | $2.3 \pm 0.5$ | 8.8 | 2.0 | $4.0 \pm 0.5$ | 0.45 | 6.5 | 2.9     |
|         |               |     |     |               |      |     |         |

- From Kerremans et al. Adv. Optical Mater. 2020, 8, 2000319.
- Estimated from extrapolating along the ITIC series, observing that  $\varepsilon_{GS\_soln}$  for ITIC-Th is between that of ITIC and ITIC-2F.

For triplet formation in the NFA blend films with PffBT4T-C9C13, we can then apply the estimated film triplet  $\varepsilon$  using the following equation:

$$n_T = \frac{\Delta OD \cdot A_v}{1000 \cdot \varepsilon_T \cdot d}$$

Where  $n_T$  is the triplet yield in  $\text{cm}^{-3}$ ,  $\Delta OD$  is corrected for absorbance,  $A_v$  is Avogadro's number,  $\varepsilon_T$  is the molar extinction coefficient of the triplet, and  $d$  is the film thickness.

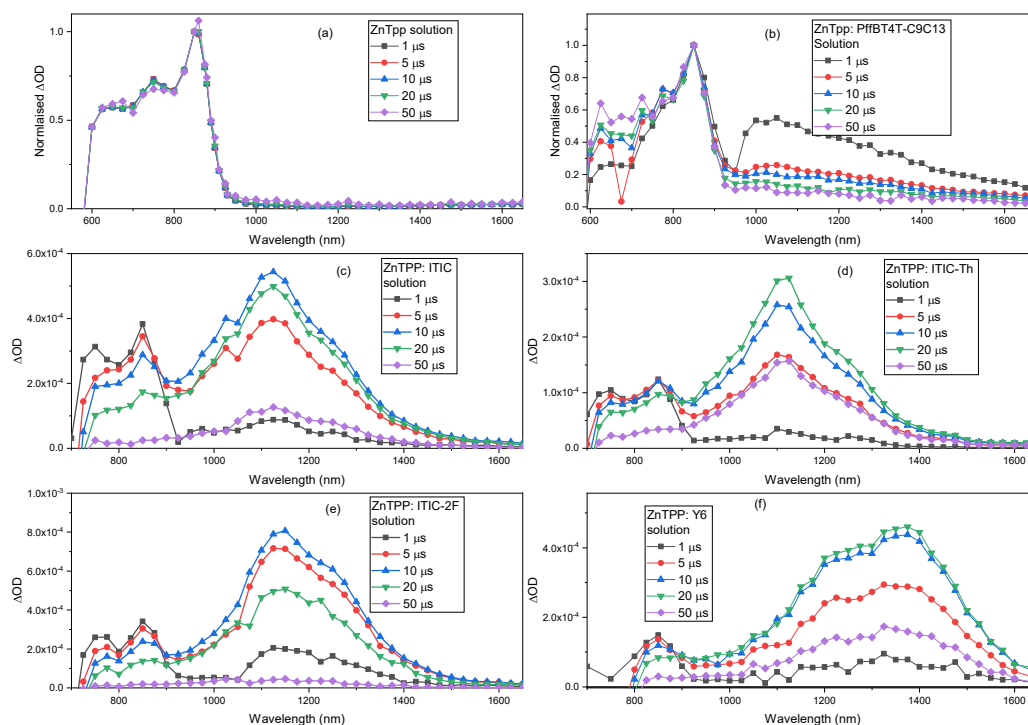

**Figure S15.** Normalised (to 1 at 850 nm) transient absorption spectra for (a) ZnTpp ( $7 \times 10^{-6} \text{M}$ ) solution with an excitation energy at  $30 \mu\text{J cm}^{-2}$ , (b) ZnTpp: PffBT4T-C9C13 ( $7 \times 10^{-6} \text{M}$ :  $0.05 \text{mg mL}^{-1}$ ) solution with an excitation energy at  $25 \mu\text{J cm}^{-2}$ . Transient absorption spectra for (c) ZnTpp:ITIC ( $7 \times 10^{-6} \text{M}$ :  $7 \times 10^{-6} \text{M}$ ) solution with an excitation energy at  $13 \mu\text{J cm}^{-2}$  (d) ZnTpp:ITIC-Th ( $7 \times 10^{-6} \text{M}$ :  $7 \times 10^{-6} \text{M}$ ) solution with an excitation energy at  $12 \mu\text{J cm}^{-2}$ , (e) ZnTpp:ITIC-2F ( $7 \times 10^{-6} \text{M}$ :  $7 \times 10^{-6} \text{M}$ ) solution



with an excitation energy at  $12 \mu\text{J cm}^{-2}$ , (f) ZnTpp:Y6 ( $7 \times 10^{-6}\text{M}$ :  $7 \times 10^{-6}\text{M}$ ) solution with an excitation energy at  $13 \mu\text{J cm}^{-2}$ . All the spectra were obtained with an excitation wavelength at 426 nm.

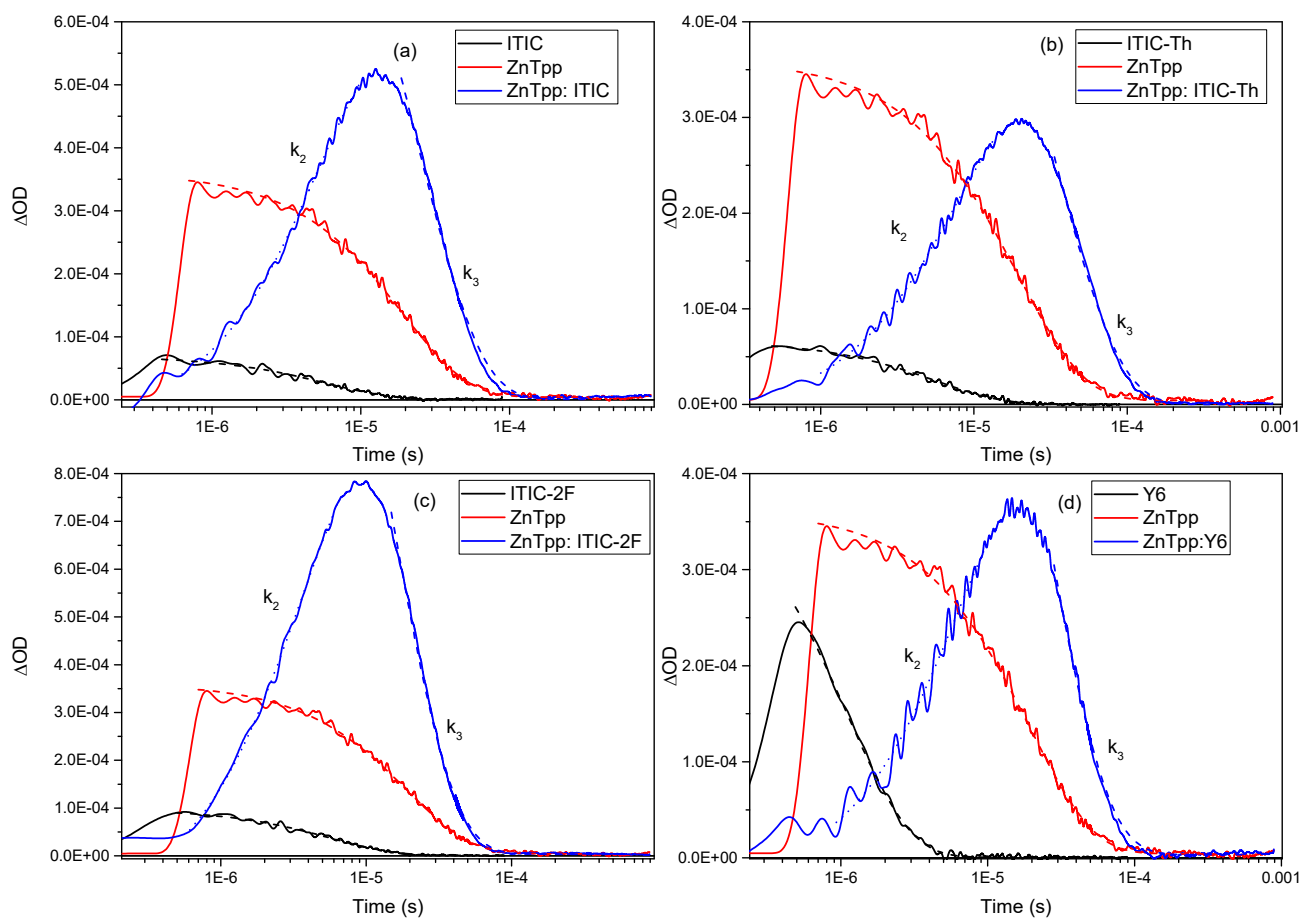

**Figure S16.** Decay dynamics of (a) ZnTpp: ITIC (1:1), ITIC, and ZnTpp solution, (b) ZnTpp: ITIC-2F (1:1), ITIC-2F, and ZnTpp solution, (c) ZnTpp: ITIC-Th (1:1), ITIC-Th, and ZnTpp solution and (d) ZnTpp: Y6 (1:1), Y6, and ZnTpp solution. All the solution with concentration  $7 \times 10^{-6}\text{M}$  and excitation wavelength  $7 \times 10^{-6}\text{M}$  and excitation wavelength 426 nm, fitted with mono-exponential decay/growth. The probe wavelength for the ZnTpp solution is 850 nm; for ZnTpp:ITIC, ITIC, ZnTpp:ITIC-Th, and ITIC-Th is 1100 nm; 1150 nm for ZnTpp:ITIC-2F and ITIC-2F; and 1400 nm for ZNTpp:Y6 and Y6. The excitation energy for all the ZnTpp:NFA solutions is around  $12\text{--}14 \mu\text{J cm}^{-2}$ .

#### References:

1. Amouyal E, Bensasson R, Land EJ 1974 *Photochem Photobiol* **20** 415–22
2. Seixas De Melo JS, Pina J, Dias FB, Maçanita AL 2013 *Appl Photochem* **9789048138** 533–85
3. Kikuchi K, Kurabayashi Y, Kokubun H, Kaizu Y, Kobayashi H 1988 *J Photochem Photobiol A Chem* **45** 261–3
